# Supplementary material
Source: Springer Nature journal article supplement (https://www.springermedizin.de/resource/supplementary/12885_2011_2966_MOESM3_ESM.pdf/9462392)

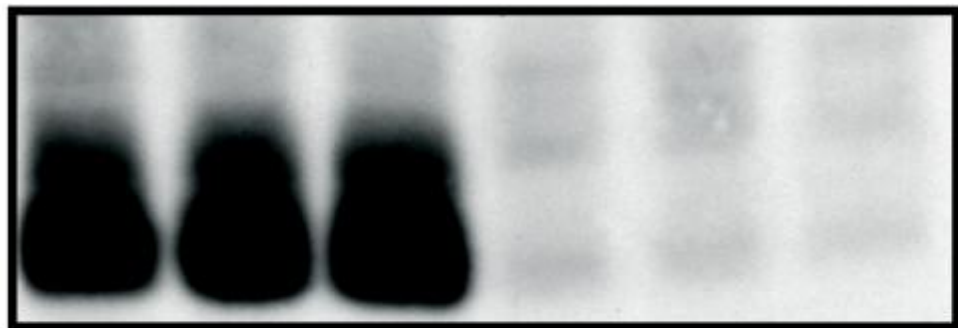

Paxillin

■  
MG132  
Lactacystin

MDCK

■  
MG132  
Lactacystin

MDCK HA-Hakai

Supplement: MOESM3 [file 9462392]
